# Supplementary material for: Hydrated ionic liquids enable both solubilisation and refolding of aggregated concanavalin A
Source: Royal Society of Chemistry journal article supplement (doi:10.1039/c8cc10102g), 2019-01-01
Supplement: c8cc10102g1.pdf [file c8cc10102g1.pdf]

## Supporting Information

### ***Hydrated ionic liquids realising high solubility and refolding of aggregated Concanavaline A***

Kyoko Fujita<sup>a\*</sup>, Roka Nakano<sup>b</sup>, Risa Nakaba<sup>a</sup>, Nobuhumi Nakamura<sup>b</sup> and Ohno Hiroyuki<sup>b</sup>

<sup>a</sup> *Department of Pathophysiology, Tokyo University of Pharmacy and Life Sciences, 1432-1 Horinouchi, Hachioji, Tokyo, 192-0392, Japan*

<sup>b</sup> *Department of Biotechnology, Tokyo University of Agriculture and Technology, 2-24-16 Nakacho, Koganei, Tokyo 184-8588, Japan*

\*Corresponding author: E-mail: [kyokof@toyaku.ac.jp](mailto:kyokof@toyaku.ac.jp), Tel and Fax: +81-42-676-5453

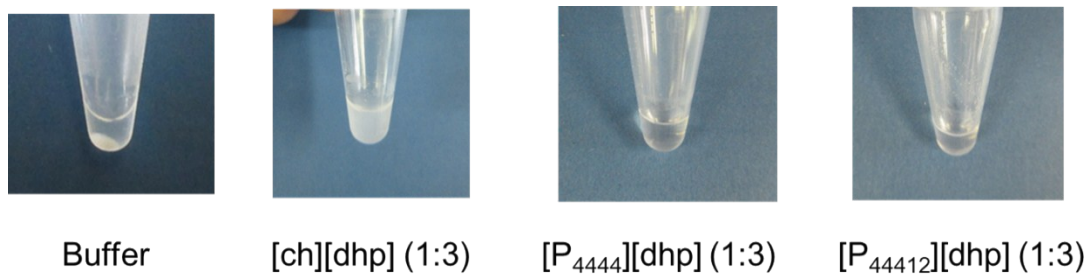

**Figure S1.** Photographs of hydrated IL with aggregated ConA after mixing for overnight at RT.

White precipitate was remaining and dispersed in buffer and hydrated [ch][dhp]. In hydrated [P<sub>4444</sub>][dhp] and [P<sub>44412</sub>][dhp] showed good solubility with transparent liquid state.

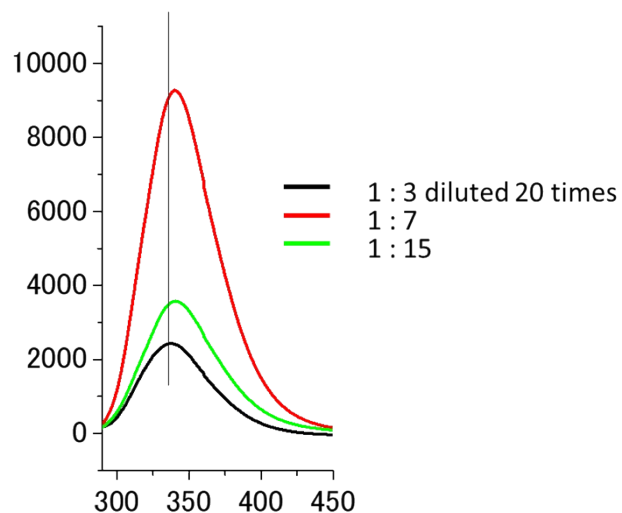

**Figure S2.** Fluorescence spectra of ConA dissolved in hydrated  $[P_{44412}][dhp]$  with different water contents

Fluorescence spectra of ConA dissolved in  $[P_{44412}][dhp]$  with 3 water molecules per ion pair was diluted with hydrated  $[P_{44412}][dhp]$ , because it dissolved aggregated ConA very well and the fluorescence intensity was saturated. The fluorescence intensity of ConA decreased with increase of water contents in  $[P_{44412}][dhp]$ . Thus, the solubility of aggregated ConA in hydrated  $[P_{44412}][dhp]$  decrease with increasing water contents. Furthermore, spectral shift was observed at  $\lambda_{max}$  from 337 to 342 nm with increasing water contents in  $[P_{44412}][dhp]$ .

Table S1 Deviation of  $\lambda_{\text{max}}$  in neat ILs from 336 nm which is the  $\lambda_{\text{max}}$  of native ConA dissolved in buffer solution.

| IL                         | Water molecules per ion pair | Shift of $\lambda_{\text{max}}$ of fluorescence spectrum of conA |
|----------------------------|------------------------------|------------------------------------------------------------------|
| [P <sub>44412</sub> ][dhp] | 0                            | -11                                                              |
| [N <sub>4444</sub> ][dhp]  | 0                            | +7                                                               |

Table S2  $\lambda_{\text{max}}$  deviation in the fluorescence spectrum of ConA dissolved in hydrated dhp-based ILs<sup>a</sup>

|                            | The number of water molecules per ion pair |       |        |
|----------------------------|--------------------------------------------|-------|--------|
|                            | 1 : 3                                      | 1 : 7 | 1 : 15 |
| [P <sub>4444</sub> ][dhp]  | + 3                                        | + 4   | + 6    |
| [P <sub>4448</sub> ][dhp]  | + 1                                        | + 4   | + 6    |
| [P <sub>44412</sub> ][dhp] | + 1                                        | + 4   | + 6    |
| [P <sub>6666</sub> ][dhp]  | + 2                                        | + 2   | + 4    |
| [P <sub>8888</sub> ][dhp]  | + 3                                        | b     | b      |
| [N <sub>1113</sub> ][dhp]  | - 3                                        | - 3   | - 2    |
| [N <sub>1118</sub> ][dhp]  | b                                          | b     | + 5    |
| [N <sub>1444</sub> ][dhp]  | b                                          | + 2   | + 3    |
| [N <sub>4444</sub> ][dhp]  | + 7                                        | + 9   | + 7    |
| [N <sub>1188</sub> ][dhp]  | b                                          | - 25  | - 25   |
| [N <sub>6666</sub> ][dhp]  | + 2                                        | + 2   | + 3    |
| [N <sub>1888</sub> ][dhp]  | - 4                                        | - 11  | b      |
| [N <sub>8888</sub> ][dhp]  | + 3                                        | b     | b      |
| [ch][dhp]                  | - 3                                        | - 1   | - 2    |

<sup>a</sup> The number indicates the shift from 336 nm, which is the fluorescence maximum of the native state ConA in buffer. <sup>b</sup> Unmeasured.
